# Supplementary material for: Promoting the Avoidance of High-Calorie Snacks: Priming Autonomy Moderates Message Framing Effects
Source: PubMed Central journal article supplement (PMC4117640; doi:10.1371/journal.pone.0103892), 2014-07-31
Supplement: pone.0103892.s001.pdf [file pone.0103892.s001.pdf]

**Figure S1. Study 1 materials: Gain-framed vs. loss-framed health messages.**

| <i>Loss-framed health message</i>                                                                                                                                                                                                                                                                                                                                                                                                                                                                                                                                                                                                                                                                                                                                                                                                                                                                                                                                                                 | <i>Gain-framed health message</i>                                                                                                                                                                                                                                                                                                                                                                                                                                                                                                                                                                                                                                                                                                                                                                                                                                                                                                                                                                           |
|---------------------------------------------------------------------------------------------------------------------------------------------------------------------------------------------------------------------------------------------------------------------------------------------------------------------------------------------------------------------------------------------------------------------------------------------------------------------------------------------------------------------------------------------------------------------------------------------------------------------------------------------------------------------------------------------------------------------------------------------------------------------------------------------------------------------------------------------------------------------------------------------------------------------------------------------------------------------------------------------------|-------------------------------------------------------------------------------------------------------------------------------------------------------------------------------------------------------------------------------------------------------------------------------------------------------------------------------------------------------------------------------------------------------------------------------------------------------------------------------------------------------------------------------------------------------------------------------------------------------------------------------------------------------------------------------------------------------------------------------------------------------------------------------------------------------------------------------------------------------------------------------------------------------------------------------------------------------------------------------------------------------------|
| <p>Snack foods such as cakes, biscuits, chocolate, crisps, ice-cream and pastries are high in saturated fat and added sugar.</p> <p>Evidence suggests that people who <b>eat lots of high calorie snacks</b> with high levels of saturated fat and added sugar, compared to those who avoid eating lots of snacks, are at <b>higher risk</b> of many serious <b>life-threatening diseases</b> and <b>lose</b> several potential health benefits.</p> <p>For example, <b>research shows that people who EAT lots of snacks have a HIGHER RISK of:</b></p> <ul style="list-style-type: none"> <li>• <b>Heart Disease and Stroke</b></li> <li>• <b>Type 2 Diabetes</b></li> <li>• <b>Cancers (e.g., bowel cancer)</b></li> </ul> <p><b>EATING lots of snacks can also mean you LOSE other HEALTH BENEFITS such as:</b></p> <ul style="list-style-type: none"> <li>• <b>Healthy looking skin and hair</b></li> <li>• <b>Healthy weight</b></li> <li>• <b>Increased energy and vitality</b></li> </ul> | <p>Snack foods such as cakes, biscuits, chocolate, crisps, ice-cream and pastries are high in saturated fat and added sugar.</p> <p>Evidence suggests that people who <b>avoid eating lots of high calorie snacks</b> with high levels of saturated fat and added sugar, compared to those who eat lots of snacks, are at <b>lower risk</b> of many serious life-threatening diseases and <b>gain</b> several potential health benefits.</p> <p>For example, <b>research shows that people who AVOID EATING lots of snacks have a LOWER RISK of:</b></p> <ul style="list-style-type: none"> <li>• <b>Heart Disease and Stroke</b></li> <li>• <b>Type 2 Diabetes</b></li> <li>• <b>Cancers (e.g., bowel cancer)</b></li> </ul> <p><b>AVOIDING EATING lots of snacks can also mean you GAIN other HEALTH BENEFITS, such as:</b></p> <ul style="list-style-type: none"> <li>• <b>Healthy looking skin and hair</b></li> <li>• <b>Healthy weight</b></li> <li>• <b>Increased energy and vitality</b></li> </ul> |
