# Supplementary material for: Promoting the Avoidance of High-Calorie Snacks: Priming Autonomy Moderates Message Framing Effects
Source: PubMed Central journal article supplement (PMC4117640; doi:10.1371/journal.pone.0103892), 2014-07-31
Supplement: pone.0103892.s002.pdf [file pone.0103892.s002.pdf]

**Figure S2: Study 2 materials: Examples of gain-framed messages with embedded autonomy or heteronomy primes.**

| <i>Gain-framed, embedded autonomy message</i>                                                                                                                                                                                                                                                                                                                                                                                                                                                                                                                                                                                                                                                                                                                                                                                                                                                                                                                                                                                                                                                                                                                                                                                                                                                     | <i>Gain framed, embedded heteronomy message</i>                                                                                                                                                                                                                                                                                                                                                                                                                                                                                                                                                                                                                                                                                                                                                                                                                                                                                                                                                                                                                                                                                                                                                                                                                       |
|---------------------------------------------------------------------------------------------------------------------------------------------------------------------------------------------------------------------------------------------------------------------------------------------------------------------------------------------------------------------------------------------------------------------------------------------------------------------------------------------------------------------------------------------------------------------------------------------------------------------------------------------------------------------------------------------------------------------------------------------------------------------------------------------------------------------------------------------------------------------------------------------------------------------------------------------------------------------------------------------------------------------------------------------------------------------------------------------------------------------------------------------------------------------------------------------------------------------------------------------------------------------------------------------------|-----------------------------------------------------------------------------------------------------------------------------------------------------------------------------------------------------------------------------------------------------------------------------------------------------------------------------------------------------------------------------------------------------------------------------------------------------------------------------------------------------------------------------------------------------------------------------------------------------------------------------------------------------------------------------------------------------------------------------------------------------------------------------------------------------------------------------------------------------------------------------------------------------------------------------------------------------------------------------------------------------------------------------------------------------------------------------------------------------------------------------------------------------------------------------------------------------------------------------------------------------------------------|
| <p><b>Choosing to avoid eating high calorie snacks</b><br/>           Snack foods such as cakes, biscuits, chocolate, crisps, ice-cream and pastries are high in saturated fat and added sugar. It is <b>up to you</b> whether you <b>choose</b> to avoid eating high calorie snacks. However, <b>evidence suggests that</b> people who <b>opt</b> to avoid eating high calorie snacks, compared to those that do not, are at lower risk of many serious life-threatening diseases. For example, research shows that if you <b>decide</b> to <b>AVOID</b> eating high calorie snacks, you can <b>LOWER YOUR RISK</b> of:</p> <ul style="list-style-type: none"> <li>• Heart Disease and Stroke</li> <li>• High blood pressure</li> <li>• High cholesterol</li> <li>• Type 2 Diabetes</li> <li>• Cancers (e.g., bowel cancer)</li> </ul> <p>If you <b>elect</b> to <b>AVOID</b> eating high calorie snacks You can also <b>GAIN POTENTIAL HEALTH BENEFITS</b>, for example:</p> <ul style="list-style-type: none"> <li>• Healthy looking skin and hair</li> <li>• Healthy weight</li> <li>• Increased energy and vitality</li> <li>• Improved physical stamina</li> <li>• Improved concentration on mental tasks</li> </ul> <p><b>The choice to avoid eating high calorie snacks is yours!</b></p> | <p><b>Requirement to avoid eating high calorie snacks</b><br/>           Snack foods such as cakes, biscuits, chocolate, crisps, ice-cream and pastries are high in saturated fat and added sugar. It is <b>essential</b> that you <b>should</b> avoid eating high calorie snacks. Furthermore, <b>evidence confirms</b> that people who avoid eating high calorie snacks, compared to those that do not, are at lower risk of many serious life-threatening diseases. For example, research shows that if you <b>make yourself AVOID</b> eating high calorie snacks, you can <b>LOWER YOUR RISK</b> of:</p> <ul style="list-style-type: none"> <li>• Heart Disease and Stroke</li> <li>• High blood pressure</li> <li>• High cholesterol</li> <li>• Type 2 Diabetes</li> <li>• Cancers (e.g., bowel cancer)</li> </ul> <p>If you <b>force yourself to AVOID</b> eating high calorie snacks you can also <b>GAIN POTENTIAL HEALTH BENEFITS</b>, such as:</p> <ul style="list-style-type: none"> <li>• Healthy looking skin and hair</li> <li>• Healthy weight</li> <li>• Increased energy and vitality</li> <li>• Improved physical stamina</li> <li>• Improved concentration on mental tasks</li> </ul> <p><b>Avoiding eating high calorie snacks is a must!</b></p> |
